# Supplementary material
Source: publisher figshare collection journal article supplement (https://diabetesjournals.figshare.com/articles/dataset/_/14974563)
Supplement: Supplementary file 1 [file 3]

**Supplemental Tables and Figures:**

**Supplemental Table 1: Unadjusted and adjusted Hazard Ratios (HRs) for the association between risk of developing type 1 diabetes and time to peak C-peptide/peak glucose at baseline in the PTP cohort stratified by age less than 18 and those 18 years or older.**

| <b>PTP (Age &lt; 18 years); N =2758</b>                                                                                                                                      |                   |               |                |                  |               |                |
|------------------------------------------------------------------------------------------------------------------------------------------------------------------------------|-------------------|---------------|----------------|------------------|---------------|----------------|
|                                                                                                                                                                              | <i>Unadjusted</i> |               |                | <i>Adjusted*</i> |               |                |
|                                                                                                                                                                              | <b>HR</b>         | <b>95% CI</b> | <b>p-value</b> | <b>HR</b>        | <b>95% CI</b> | <b>p-value</b> |
| <b>Time to Peak C-peptide (&gt; 60 vs ≤ 60 mins)</b>                                                                                                                         | 2.85              | 2.40, 3.37    | <0.001         | 2.87             | 2.37, 3.47    | <0.001         |
| <b>Time to Peak Glucose (&gt; 30 vs at 30 mins)</b>                                                                                                                          | 3.45              | 2.90, 4.10    | <0.001         | 2.14             | 1.74, 2.64    | <0.001         |
| <b>PTP (Age ≥ 18 years); N =959**)</b>                                                                                                                                       |                   |               |                |                  |               |                |
|                                                                                                                                                                              | <b>HR</b>         | <b>95% CI</b> | <b>p-value</b> | <b>HR</b>        | <b>95% CI</b> | <b>p-value</b> |
| <b>Time to Peak C-peptide (&gt; 60 vs ≤ 60 mins)</b>                                                                                                                         | 3.46              | 2.12, 5.65    | <0.001         | 3.69             | 2.07, 6.58    | <0.001         |
| <b>Time to Peak Glucose (&gt; 30 vs at 30 mins)</b>                                                                                                                          | 5.10              | 2.92, 8.91    | <0.001         | 2.51             | 1.27, 4.95    | 0.004          |
| * C-peptide adjusted for peak C-peptide level, age, sex, race, BMI z-score and HOMA-IR.<br>Glucose adjusted for peak glucose level, age, sex, race, BMI z-score and HOMA-IR. |                   |               |                |                  |               |                |
| **Age was missing in 3.                                                                                                                                                      |                   |               |                |                  |               |                |

**Supplemental Table 2: Unadjusted and adjusted HRs for association between risk of developing type 1 diabetes and time to peak C-peptide/peak glucose at baseline in the PTP cohort stratified by number of antibody status (single versus multiple).**

| <b>PTP (Single Ab+; N=1481)</b>                                                                                                                                                    |                   |               |                       |                  |               |                       |
|------------------------------------------------------------------------------------------------------------------------------------------------------------------------------------|-------------------|---------------|-----------------------|------------------|---------------|-----------------------|
|                                                                                                                                                                                    | <i>Unadjusted</i> |               |                       | <i>Adjusted*</i> |               |                       |
|                                                                                                                                                                                    | <b>HR</b>         | <b>95% CI</b> | <b><i>p</i>-value</b> | <b>HR</b>        | <b>95% CI</b> | <b><i>p</i>-value</b> |
| <b>Time to Peak C-peptide<br/>(&gt; 60 vs ≤ 60 min)</b>                                                                                                                            | 2.67              | 1.82, 3.92    | <0.001                | 2.91             | 1.86, 4.54    | <0.001                |
| <b>Time to Peak Glucose<br/>(&gt; 30 vs at 30 min)</b>                                                                                                                             | 3.024             | 2.19, 4.81    | <0.001                | 2.11             | 1.31, 3.39    | 0.002                 |
| <b>PTP (Multiple Ab+; N=2239)</b>                                                                                                                                                  |                   |               |                       |                  |               |                       |
|                                                                                                                                                                                    | <b>HR</b>         | <b>95% CI</b> | <b><i>p</i>-value</b> | <b>HR</b>        | <b>95% CI</b> | <b><i>p</i>-value</b> |
| <b>Time to Peak C-peptide<br/>(&gt; 60 vs ≤ 60 min)</b>                                                                                                                            | 2.44              | 2.05, 2.91    | <0.001                | 2.57             | 2.11, 3.14    | <0.001                |
| <b>Time to Peak Glucose<br/>(&gt; 30 vs at 30 min)</b>                                                                                                                             | 2.97              | 2.48, 3.57    | <0.001                | 1.87             | 1.50, 2.34    | <0.001                |
| * C-peptide adjusted for peak C-peptide level, age, gender, race, BMI-z-score and HOMA-IR.<br>Glucose adjusted for peak glucose level, age, gender, race, BMI-z-score and HOMA-IR. |                   |               |                       |                  |               |                       |

**Supplemental Table 3: Change in HOMA-IR and BMI-z from first to last OGTT by progressor status as well as by timing of peak status:**

| <b>Change from 1<sup>st</sup> to (Last OGTT)</b>       | <b>Non-Progressors</b> | <b>Progressors</b>   | <b>P-Value</b> |
|--------------------------------------------------------|------------------------|----------------------|----------------|
| <b><u>By Progression Status</u></b>                    |                        |                      |                |
| <b>HOMA-IR</b>                                         | <b>0.204 (1.737)</b>   | <b>0.310 (1.533)</b> | <b>0.110</b>   |
| <b>BMI Z-Score</b>                                     | <b>0.081 (0.673)</b>   | <b>0.061 (0.556)</b> | <b>0.395</b>   |
|                                                        |                        |                      |                |
| <b><u>By Glucose Peak and Progression Status</u></b>   |                        |                      |                |
| <b>Glucose Peak =30 mins</b>                           |                        |                      |                |
| <b>HOMA-IR</b>                                         | <b>0.193 (1.607)</b>   | <b>0.259 (2.003)</b> | <b>0.663</b>   |
| <b>BMI Z-Score</b>                                     | <b>0.062 (0.710)</b>   | <b>0.149 (0.702)</b> | <b>0.089</b>   |
|                                                        |                        |                      |                |
| <b>Glucose Peak &gt;30 mins</b>                        |                        |                      |                |
| <b>HOMA-IR</b>                                         | <b>0.217 (1.875)</b>   | <b>0.327 (1.335)</b> | <b>0.161</b>   |
| <b>BMI Z-Score</b>                                     | <b>0.102 (0.629)</b>   | <b>0.028 (0.487)</b> | <b>0.006</b>   |
|                                                        |                        |                      |                |
| <b><u>By C-Peptide Peak and Progression Status</u></b> |                        |                      |                |
| <b>C-peptide Peak ≤60 mins</b>                         |                        |                      |                |
| <b>HOMA-IR:</b>                                        | <b>0.243 (1.602)</b>   | <b>0.297 (1.384)</b> | <b>0.612</b>   |
| <b>BMI Z-Score</b>                                     | <b>0.071 (0.630)</b>   | <b>0.138 (0.721)</b> | <b>0.187</b>   |
|                                                        |                        |                      |                |
| <b>C-peptide Peak &gt; 60 mins</b>                     |                        |                      |                |
| <b>HOMA-IR</b>                                         | <b>0.163 (1.870)</b>   | <b>0.315 (1.588)</b> | <b>0.081</b>   |
| <b>BMI Z-Score</b>                                     | <b>0.091 (0.717)</b>   | <b>0.030 (0.471)</b> | <b>0.029</b>   |

HOMA IR = [Fasting Insulin (μU/L) \* Fasting Glucose (mg/dL)] / 405  
Values represent mean (±SD)

**Supplemental Table 4: Comparison of measures of  $\beta$ -cell function and insulin resistance**

|                        | <b>Glucose Peak <math>\leq</math>30 mins</b> | <b>Glucose Peak &gt;30 mins</b> | <b>p-value</b>   |
|------------------------|----------------------------------------------|---------------------------------|------------------|
| <b>HOMA-IR</b>         | <b>1.739 (1.589)</b>                         | <b>1.798 (1.728)</b>            | <b>0.305</b>     |
| <b>C-peptide Index</b> | <b>0.092 (0.096)</b>                         | <b>0.068 (0.212)</b>            | <b>&lt;0.001</b> |

|                        | <b>C-peptide Peak <math>\leq</math>60 mins</b> | <b>C-peptide Peak &gt;60 mins</b> | <b>p-value</b>   |
|------------------------|------------------------------------------------|-----------------------------------|------------------|
| <b>HOMA-IR</b>         | <b>1.729 (1.418)</b>                           | <b>1.805 (1.849)</b>              | <b>0.180</b>     |
| <b>C-peptide Index</b> | <b>0.097 (0.228)</b>                           | <b>0.065 (0.090)</b>              | <b>&lt;0.001</b> |

C-peptide Index = (Change in C-peptide 30 – 0 minutes (ng/mL))/(Change in Glucose 30 – 0 minutes (mg/dL))  
 Values represent the mean ( $\pm$ SD)

**Supplemental Figure Legends:**

**Supplemental Figure 1: PTP Sample selection**

**Supplemental Figure 2: Type 1 Diabetes Free curve by timing of peak glucose in the DPT-1 cohort.**

**Supplemental Figure 3: Type 1 Diabetes Free curve by timing of peak C-peptide in the DPT-1 cohort.**

**Supplemental Figure 4: Evaluation of the relationship between  $1/\text{fasting insulin}$  and C-peptide index**

**Supplemental Figure 4:**

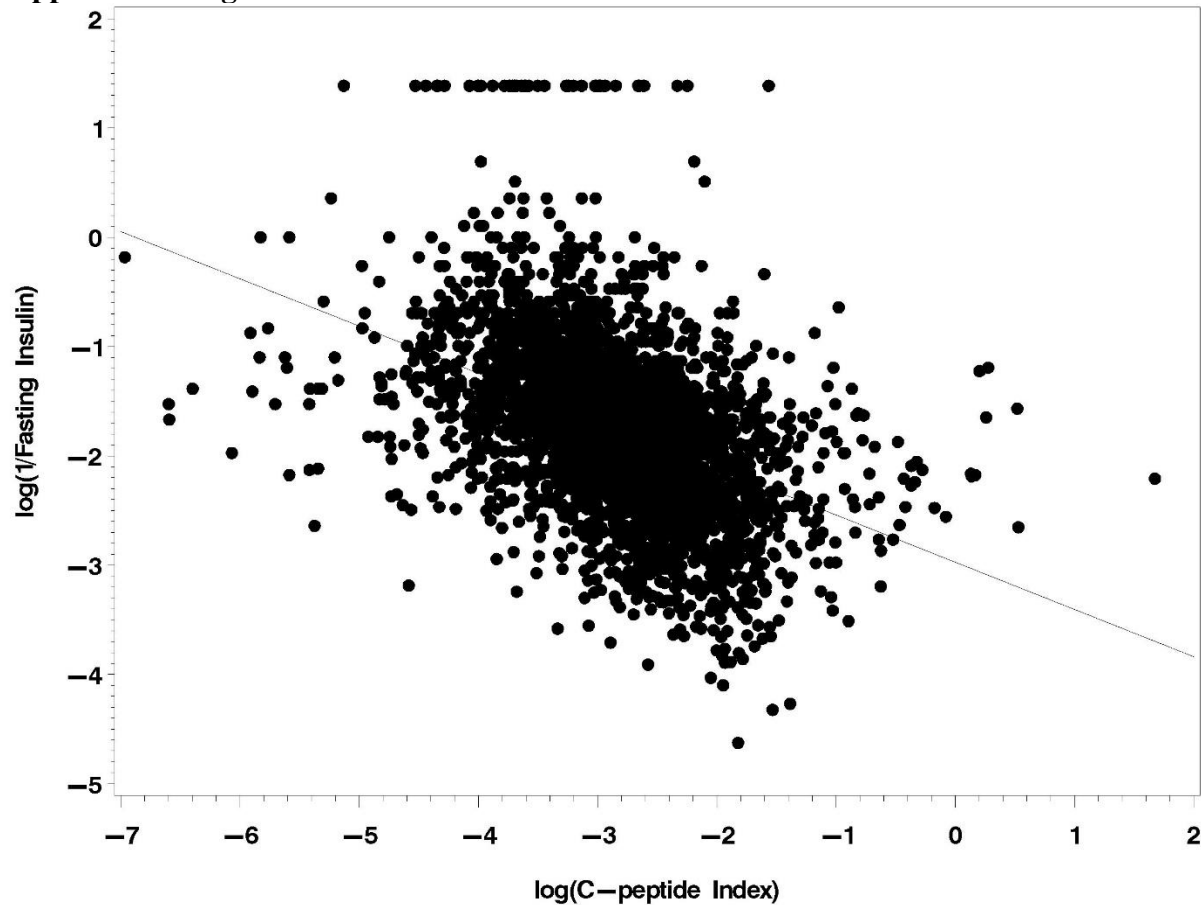

In order to evaluate the relationship between 1/fasting insulin and C-peptide index, the log of these of parameters were calculated, and plotted against each other. We used data from a total of 3277 participants (from those with insulin levels from IVGTTs in DPT-1 and OGTTs in PTP). The source for the procedures to test for the hyperbolic relationship is referenced in Retnakaran et. al, Obesity, 2008.

Using a regression model of  $\log(1/\text{fasting})$  vs.  $\log(\text{C-peptide index})$ , a hyperbolic relationship can be confirmed if the parameter estimate for  $\log(\text{C-peptide index})$  is -1 with a 95% confidence interval that excludes 0. In supplemental figure 4, the parameter estimate for  $\log(\text{C-peptide index})$  is -0.43 with a 95% CI of (-0.46, -40). It was, thus, concluded that the relationship was not hyperbolic.

**Similarly, when using log HOMA-IR in place of log 1/fasting insulin in the regression model, the results of the analysis were that, like the oDI calculated using 1/fasting Insulin – the relationship is not hyperbolic. The parameter estimate for log(C-peptide index) was 0.44 with a 95% CI of (0.40, 0.47), which is not -1.**

Retnakaran R, Shen S, Hanley AJ, Vuksan V, Hamilton JK, Zinman B. Hyperbolic relationship between insulin secretion and sensitivity on oral glucose tolerance test. *Obesity (Silver Spring)*. 2008 Aug;16(8):1901-7. doi: 10.1038/oby.2008.307. Epub 2008 Jun 12. PMID: 18551118. (<https://pubmed.ncbi.nlm.nih.gov/18551118/>)
