# Supplementary material
Source: publisher figshare collection journal article supplement (https://diabetesjournals.figshare.com/articles/dataset/_/14974563)
Supplement: Supplementary file 2 [file 3]

## **ONLINE APPENDIX. Type 1 Diabetes TrialNet Study Group.**

*Personnel as of 7/22/20.*

**Steering Committee:** Carla J. Greenbaum (Benaroya Research Institute), Mark Anderson (University of California, San Francisco), Mark A. Atkinson (University of Florida), Emanuele Bosi (San Raffaele University), Todd M. Brusko (University of Florida), Jane Buckner (Benaroya Research Institute), Mark Clements (The Children's Mercy Hospital), Peter G. Colman (Walter & Eliza Hall Institute of Medical Research), Mark Daniels (Children's Hospital of Orange County), Linda DiMeglio (Indiana University), Carmella Evans-Molina (Indiana University), Jason Gaglia (Joslin Diabetes Center), Stephen E. Gitelman (University of California, San Francisco), Robin Goland (Columbia University), Peter Gottlieb (Barbara Davis Center for Childhood Diabetes), Michael Haller (University of Florida), Kevan Herold (Yale University), Martin J. Hessner (Medical College of Wisconsin), Mikael Knip (University of Helsinki), Jeffrey P. Krischer (University of South Florida), Ake Lernmark (Skane University Hospital), Ingrid Libman (University of Pittsburgh), Peter S. Linsley (Benaroya Research Institute), Yuk-Fun Liu (University of Bristol), Alice Long (Benaroya Research Institute), Wayne Moore (The Children's Mercy Hospital), Antoinette Moran (University of Minnesota), Andrew Muir (Emory Children's Center), Jerry Palmer (University of Washington), William Russell (Vanderbilt Eskind Diabetes Clinic), Lisa Spain (National Institute of Diabetes and Digestive and Kidney Diseases [NIDDK]), Andrea Steck (Barbara Davis Center for Childhood Diabetes), John Wentworth (Walter & Eliza Hall Institute of Medical Research), Diane Wherrett (University of Toronto), Darrell M. Wilson (Stanford University), William Winter (University of Florida), Perrin White (University of Texas Southwestern), Anette Ziegler (Technical University Munich).

**Past Members:** David A. Baidal (University of Miami), Manuela Battaglia (San Raffaele University), Dorothy Becker (University of Pittsburgh), Penelope Bingley (University of Bristol), Mark Peakman (King's College), Louis Philipson (University of Chicago), Philip Raskin (University of Texas Southwestern), Maria Redondo (Baylor Texas Children's Hospital), Henry Rodriguez (University of South Florida Diabetes and Endocrinology Center), Desmond A. Schatz (University of Florida), Jay M. Sosenko (University of Miami).

**Executive Committee:** Carla J. Greenbaum (Benaroya Research Institute), Jeffrey P. Krischer (University of South Florida), Lisa Spain (National Institute of Diabetes and Digestive and Kidney Diseases [NIDDK]).

**Chair's Office:** Carla J. Greenbaum (Benaroya Research Institute), Lisa Rafkin (University of Miami).

**Past Members:** Jay M. Sosenko (University of Miami).

**TrialNet Coordinating Center (University of South Florida):** Jeffrey P. Krischer, Brian Bundy, Michael Abbondandolo, Timothy Adams, Logan Alford, Jenna Bjellquist, Matthew Boonstra, Brandie Brehon, David Cuthbertson, Christopher Eberhard, Steve Fiske, Julie Ford, Jennifer Garmeson, Cameron Hainline, Brian Hays, Kathleen Heyman, Belinda Hsiao, Christina Karges, Brett Loechelt, Shu Liu, Kristin Maddox, Colleen M. Maguire, Jamie Malloy, Alexandria Matos, Cameron McNeill, Margaret Moore, Sarah Muller, Thuy Nguyen, Ryan O'Donnell, Melissa Parker, MJ Pereyra, Kelly Sadler, Roy Tamura, Elon Walker-Veras, Keith Wood, Kenneth Young.

**Past Members:** Ilma Asif, Cristina Burroughs, Mario Cleves, Meagan DeSalvatore, Susan Geyer, Courtney Henderson, Martha Henry, Beata-Gabriela Koziol, Lindsay Lane, Jennifer Lloyd, Julie Martin, Jodie Nunez, Amy Roberts, Christine Sullivan, Megan V. Warnock, Rebecca Wood, Ping Xu, Vanessa Yanek.

**National Institute of Diabetes and Digestive and Kidney Diseases [NIDDK]:** Lisa Spain.

**Data Safety and Monitoring Board:** Emily Blumberg (University of Pennsylvania), Sean Aas (Georgetown University), Gerald Beck (Cleveland Clinic Foundation), Rose Gubitosi-Klug (Case Western Reserve University), Dennis Wallace.

**Past Members:** Lori Laffel (Joslin Diabetes Center), Robert Vigersky (Medtronic).

**Infectious Disease Safety Committee:** Lindsey Baden (Brigham and Women's Hospital), Peter Gottlieb (Barbara Davis Center for Childhood Diabetes), Michael Green (University of Pittsburgh), Adriana Weinberg (University of Colorado).

**Collaborative Mechanistic Studies Panel:** Peter A. Gottlieb (Barbara Davis Center for Childhood Diabetes), Mark Anderson (University of California, San Francisco), Mark A. Atkinson (University of Florida), Todd M. Brusko (University of Florida), Jane H. Buckner (Benaroya Research Institute), Carmella Evans-Molina (Indiana University), Kevan C. Herold (Yale University), Martin J. Hessner (Medical College of Wisconsin), Peter S. Linsley (Benaroya Research Institute), Alice Long (Benaroya Research Institute), Sarah Muller (University of Florida), David A. G. Skibinski (Benaroya Research Institute), Perrin White (University of Texas Southwestern).

**Past Members:** Manuela Battaglia (San Raffaele University), Mark Peakman (King's College).

**Laboratory Directors:** Santica Marcovina (University of Washington), Jerry P. Palmer (University of Washington), Jay Tischfield (Rutgers University), Adriana Weinberg (University of Colorado), William Winter (University of Florida), Liping Yu (Barbara Davis Center for Childhood Diabetes).

**TrialNet Clinical Network Hub (Benaroya Research Institute):** Annie Shultz, Emily Batts, Arielle Pagryzinski, Michele Patience Staal.

**Past Members:** Kristin Fitzpatrick, Melita Romasco, Christopher Webb, Mary Ramey, Meghan Tobin.

## **Active Personnel at Sites Participating in the TN01 Protocol:**

**Barbara Davis Center for Childhood Diabetes, Aurora, Colorado:** Andrea K. Steck, Brenda Bradfield, Lexie Chesshir, Peter A. Gottlieb, Aaron W. Michels, Morgan Quist, Becky Robinson, Sona Seligova, Kimber Simmons, Taylor Triolo.

**Benaroya Research Institute, Seattle, Washington:** Carla J. Greenbaum, Jane H. Buckner, Wei Hao, David Kook, Sandra Lord, Marli McCulloch-Olson, Mary Ramey, Elaine Sachter, Jenna Snively, Corinna Tordillos, Dana VanBuecken, Nancy Wickstrom.

**The Children's Mercy Hospital, Kansas City, Missouri:** Wayne Moore, Marissa Beidelschies, Darlene Brenson-Hughes, Jennifer Boyd, Mark Clements, Jennifer Dolan, Aliza Elrod, Emily Haith, Kelsee Halpin, Kelsye Howell, Jennifer James, Laura Jones, Terri Luetjen, Cassandra McClain, Ryan McDonough, Susan Mitchell, Fadi Al Muhaisen, Steve Orlich, Emily Paprocki, Barbara Seufferling, Jill Sexton.

**Columbia University, New York, New York:** Robin Goland, Analia Alvarez, Magdalena Bogun, Rachelle Gandica, Jacqueline Lonier, Sarah Pollak, Kristen Williams.

**Emory Children's Center, Atlanta, Georgia:** Andrew Muir, Amber Antich, Kristina Cossen, Eric Felner, Margaret Jenkins, Brittney Powell-Lee, Wanda Sanchez.

**The Hospital for Sick Children, Toronto, Canada:** Diane K. Wherrett, Lindsay Demoe, Danyella Dias, Lesley Eisel, Roze Kovalakovska, Mary Jo Ricci, Rebecca Stochinsky.

**Indiana University, Indianapolis, Indiana:** Linda A. DiMeglio, Carmella Evans-Molina, Eric Grubbs, Heba M. Ismail, Megan Legge, Anna Neyman, Juan Sanchez, Emily K. Sims, Maria Spall, Stephanie Woerner.

**San Raffaele Hospital, Milan, Italy:** Emanuele Bosi, Eleonora Bianconi, Andrea Bolla, Ricardo Bonfanti, Amelia Caretto, Giulio Frontino, Pauline Grogan, Andrea Laurenzi, Chiara Molinari, Matteo Pastore, Alessandra Petrelli.

**Skane University Hospital, Scania, Sweden:** Åke Lernmark, Linda Ahlkvist, Henrik Borg, Berglind Jónsdóttir, Anastasia Katsarou, Helena Larsson, Markus Lundgren, Ulrika Ulvenhag.

**Stanford University, Stanford, California:** Darrell M. Wilson, Tandy Aye, Laura Bachrach, Trudy Esrey, Laura Nally, Priya Prahalad.

**University of Bristol, Bristol, England:** Chris Anderson, Yuk-Fun Liu, Ramesh Srinivasan Benjamin Field, Tracey Hughes, Vicky King, Sam Loud, Beth Thorne.

**University of California, San Francisco, California:** Stephen E. Gitelman, Fatema Abdulhussein, Natalie Aceves, Mark S. Anderson, Glenna Auerback, Jeanne Buchanan, Hannah Chesser, Abby Cobb-Walch, Laura Dapkus, Karen Ko, Janet Lee, Roger Long, Isabella Niu, Srinath Sanda, Caroline Schulmeister, Christine Torok, Rebecca Wesch, Jenise Wong.

**University of Florida, Gainesville, Florida:** Michael J. Haller, Annie Abraham, Janey Adams, Anastasia Albanese-O'Neill, Mark A. Atkinson, Brittany Bruggeman, Todd M. Brusko, Michael J. Claire-Salzler, Kristin Dayton, Paul Hiers, Jennifer Hosford, Laura M. Jacobsen, John Marks, Henry Rohrs, Desmond A. Schatz, Janet Silverstein, Paula Towe, William E. Winter.

**University of Helsinki, Helsinki, Finland:** Mikael Knip, Minna Hirvasniemi, Katriina Koski, Kristiina Luopajarvi, Heli Siljander, Riitta Veijola.

**University of Minnesota, Minneapolis, Minnesota:** Antoinette M. Moran, Shannon Beasley, Melena D. Bellin, Janice Leschyshyn, Jennifer McVean, Brandon M. Nathan, Brittney Nelson, Beth Pappenfus, Jessica Ruedy, Anne Street.

**University of Pittsburgh, Pittsburgh, Pennsylvania:** Dorothy J. Becker, Ingrid M. Libman, Kelli DeLallo, David Groscost, Mary Beth Klein, Karen Riley, Carly Shelleby, Frederico Toledo.

**University of Texas Southwestern, Dallas, Texas:** Perrin White, Lauren Boyles, Yasmin Dominguez, Philip Raskin.

**Vanderbilt Eskind Diabetes Clinic, Nashville, Tennessee:** William E. Russell, Faith Brendle, Anne Brown, Brenna Hammel, Jenny Leshko, Daniel J. Moore, Kimberly Rainer, Tyler Smith, James W. Thomas, George Williams, Sarah Wright.

**Walter & Eliza Hall Institute of Medical Research, Parkville, Australia:** Peter Colman, Marika Bjoransen, Spiros Furlanos, Leonard C. Harrison, Felicity Healy, Leanne Redl, John M. Wentworth.

**Yale University, New Haven, Connecticut:** Kevan C. Herold, Laurie Feldman, William V. Tamborlane, Stuart A. Weinzimmer.
